# Supplementary material for: The demanding attention of tuberculosis in allogeneic hematopoietic stem cell transplantation recipients: High incidence compared with general population
Source: PubMed Central journal article supplement (PMC5344370; doi:10.1371/journal.pone.0173250), 2017-03-09
Supplement: pone.0173250.s001.pdf [file pone.0173250.s001.pdf]

# Minimal data set for tuberculosis in allogeneic hematopoietic stem cell transplantation recipients

**Serial No :**

**Name :**

**Age/Sex :** / (age at HSCT)

**Chart No :**

**Underlying Disease :**

- AML       ALL       CML  
 MDS       MM       Others ( )

**BMT date :**

**Type of SCT**

- Syngeneic       Matched-related       Matched-unrelated       Family mismatch

**Stem cell Source**

- BM       PBS       BM + PBSC       Cord blood

**Conditioning regimen (TBI)**       TBI based       No-TBI based

**Conditioning regimen (ATG)**       ATG       No-ATG

**Conditioning Intensity**       Myeloablative       Non-myeloablative (mini-)

**GVHD prophylaxis**

- Cyclosporine       Methotrexate       FK506       MMF       Others ( )

**Acute GVHD**             None             Yes

Overall grade :

aGVHD date :

Involved organ :

Outcome             Improvement             Aggravation

**Chronic GVHD**             None             Limited             Extensive

cGVHD date :

Involved organ :

Grade             Mild             Moderate             Severe

Outcome             Improvement             Aggravation

**Relapse of hematologic disease**     Yes     No

Relapse date :

**Death**             Yes     No

Date of death :

Cause of death :

Last follow up date :

**IGRA**             Positive             Negative             Not done

**INH prophylaxis**             Yes     No     Not done

If yes, duration :

If no, the reason :

**Events during INH prophylaxis**

- Drug toxicity ( )
- Relapse of hematologic disease ( )
- Aggravation of GVHD ( )
- Others ( )

-----

**TB after HSCT**             Yes             No

Date of TB Diagnosis :

**Dx of tuberculosis**

- PROVEN**                             Culture, culture site :
- PROBABLE**                         AFB Smear, site :
- Tissue histology, site :
- Fluid cytology, site :
- POSSIBLE**                         Radiologic result, site :                         Improve after anti TB medication
- Not improve after antibacterial and antifungal medication

**Past Hx of TB**                         Yes                                                 No

**Sx & Sign**

- Fever (duration : )                                                 Cough (duration : )
- Sputum (duration : )                                                 Weight loss (duration : )
- Night sweat (duration : )                                                 Dyspnea (duration : )
- Chest pain (duration : )                                                 Others ( )

**Site of Infection**

- Pulmonary

- Extrapulmonary (Pleura, Liver, Spleen, BM, CNS, L/N, Others ( ))
- Disseminated (involved organs : )

**Anti TB medication**

Duration of Medication ( ) months

Regimen  INH  RFP  EMB  PZ  others ( )

Change to 2nd line drugs?  Yes  No

If yes, the reasons : the regimen : duration :

**Response to anti-TB medication**

- Cure of TB
- Improvement of TB
- Aggravation of TB
- Death due to TB

**Events during anti-TB medication**

- IRIS, site :
- Drug toxicity ( )
- Others ( )

**Results of susceptibility test (Sensitive, Resistant)**

INH (S, R), RFP (S, R), MBT (S, R), PZ (S, R),  
OFX (S, R), CS (S, R), SM (S, R), PAS (S, R),  
Prithionamide (S, R), Enviomycin (Tuberlactinomycin) (S, R),  
Others ( ) (S, R), Others ( ) (S, R)
